# Supplementary material for: Detection of glyphosate with a copper(ii)-pyrocatechol violet based GlyPKit
Source: Royal Society of Chemistry journal article supplement (doi:10.1039/d1ay01168e), 2021-01-01
Supplement: d1ay01168e1.pdf [file d1ay01168e1.pdf]

## Detection of Glyphosate with a Copper(II)-Pyrocatechol Violet Based GlyPKit

Prerna Yadav and Felix Zelder\*

*Department of Chemistry, University of Zurich, Winterthurerstrasse 190, CH-8057 Zurich, Switzerland. Fax: +41 44 635 6803; E-mail: [felix.zelder@chem.uzh.ch](mailto:felix.zelder@chem.uzh.ch), [www.felix-zelder.net](http://www.felix-zelder.net).*

### Contents

|                                                                    |     |
|--------------------------------------------------------------------|-----|
| S1. General Information and Instrumentation.....                   | S2  |
| S2. Screening Procedure.....                                       | S2  |
| S3. CSPE Method. ....                                              | S3  |
| S4. Smartphone Colorimetry.....                                    | S3  |
| Figure S1. Indicators, metal ions and pH of screening process..... | S4  |
| Figure S2. Titration of PV with Cu <sup>2+</sup> .....             | S5  |
| Figure S3. Stability studies of PV-Cu <sup>2+</sup> .....          | S5  |
| Figure S4. Pictures of well plates.....                            | S6  |
| Figure S5. Comparison between solution and solid phase.....        | S7  |
| Figure S6. Pictures of GlyPKits: selectivity studies .....         | S7  |
| Table S1: First step of screening process.....                     | S8  |
| Table S2. Second step of screening process.....                    | S10 |
| Figure S7. Picture of plate 1 of whole screening process.....      | S11 |
| Table S3. Documentation of plate 1.....                            | S12 |
| Figure S8. Picture of plate 2 of whole screening process.....      | S14 |
| Table S4. Documentation of plate 2.....                            | S15 |
| S5. References.....                                                | S16 |

## S1. General Information and Instrumentation

Unless otherwise stated, all chemicals were of reagent grade and were commercially purchased from *Sigma–Aldrich–Merck*, *Fluka*, *Apollo Scientific* or *Alfa Aesar*. Solvents for reactions were of p.a. grade. CHROMABOND C18ec cartridges (1 mL, 100 mg) were obtained from *Machery-Nagel AG* Schweiz.

UV-Vis spectra were measured at  $T = 22 \pm 1$  °C with a *Cary 50* spectrophotometer using quartz cells with a path length of 1 cm. Spectra were recorded between 230 and 800 nm at 1.2 nm resolution and 20 points  $s^{-1}$ .

Stock solutions were prepared freshly before use. The desired pH values of the stock solutions of buffers: Acetate (10 mM; pH 5.50), HEPES (10 mM; pH 7.40) and CHES (10 mM; pH 9.00) were adjusted by the addition of either a solution of 2 N NaOH or 1 N HCl. All measurements were performed at a final buffer concentration of 10 mM. The pH values of solutions were measured with a *Metrohm 827* pH lab.

Selectivity and sensitivity studies were performed with  $Zn^{II}$ -zincon and  $Cu^{II}$ -PV in either a quartz cuvette or a 26-well plate.

## S2. Screening Procedure

*Indicators* used in this study: pyrocatechol violet (PV), xylidyl blue (XB), green B (GB), murexide (MX), xylenol orange (XO), alizarin red S (ARS), pyrogallol red (PR) and zincon (ZCN). Stock solutions of the indicators were freshly prepared in either Milli-Q  $H_2O$  or DMSO/Milli-Q  $H_2O$  mixture. *Metal ions* used in this study:  $FeCl_3$ ,  $ZnCl_2$ ,  $NiCl_2$ ,  $CuCl_2$  (1 or 2 equiv). *Anions* used in this study: sodium salts except glyphosate (GlyP). *Potential Interfering Ions*:  $PO_4^{3-}$ ,  $SO_4^{2-}$ ,  $NO_3^-$ ,  $CO_3^{2-}$ ,  $Cl^-$ ,  $Na^+$ ,  $K^+$ ,  $Mg^{2+}$ ,  $Ca^{2+}$ ,  $NH_4^+$ , GlyP,  $Fe^{3+}$ ,  $Zn^{2+}$  and  $Mn^{2+}$ .<sup>[S1]</sup> Stock solutions of ions were prepared in Milli-Q  $H_2O$  or tap water.

Naked-eye screening of the indicators and the metal ions was performed at pH 5.50, 7.40 and 9.00.

*Screenings* were performed in a 96-well plate. Changes in color were detected by naked-eye.

*First step*: Selection criteria for  $M^{n+}$ -indicators were: a) a visual color change that is detectable by naked-eye with a high color contrast between metal-free indicator and the respective  $M^{n+}$ -indicator complex; b) stability of  $M^{n+}$ -indicators, i.e. no change in intensity of colors during the screening experiment (approx. 2h).

*Second step:* Selection of GlyP sensor candidates were: c) a visual color change of the  $M^{n+}$ -indicator complex (selected in the first step) upon additions of GlyP to the color of the metal-free indicator. d) no visual color change of the  $M^{n+}$ -indicator complex (selected in the first step) upon additions of  $PO_4^{3-}$ .

### **S3. CSPE Method<sup>[S2-S4]</sup>**

The colorimetric solid phase extraction (CSPE) device consisted of a 5 mL syringe connected to a C18ec cartridge. The procedure is described for immobilized  $Cu^{II}$ -PV.

1. *Conditioning:* The cartridge was washed with MeOH (2 mL) and distilled  $H_2O$  (3 mL).
2. *Adsorption of  $M^{n+}$ -Indicator:* An aq. soln. of  $Cu^{II}$ -PV (2 mL, 5  $\mu$ M) at pH 6.50 ([HEPES] = 10 mM) was slowly passed through C18ec cartridges (approx. 1 drop per 3 s). The immobilized metal complex was visible as a blue colored ring (height  $\sim$ 1 mm; *detection zone*).
3. *Analysis:* Buffered tap water (pH 6.50; HEPES buffer = [10 mM]) spiked with either GlyP or other potentially interfering ions was slowly passed (approx. 1 drop per 3 s) through the GlyPKit containing immobilized  $Cu^{II}$ -PV. Detection was indicated by a change of color.

### **S4. Smartphone Colorimetry**

We used an *OPPO F9* with front camera (16 MP) and LED flash. Pictures were taken in the daytime between 2 – 4 p.m. CET in November. All artificial sources of light were switched off and the photos were taken against a white background to get a better picture quality and consistency.

Calibration samples were prepared by slowly passing cartridges separately (approx. 1 drop per 3 s with aq. tap water solns. of GlyP (2 mL; 0, 2, 4, 8, 12, 20, 40 and 200 nmoles) at pH 6.50 (HEPES buffer = [10 mM]) through the GlyPKit. Change in color in the detection zone were observed by naked-eye or analyzed using smartphone colorimetry. In total, 20 photos of each calibration sample were taken and averaged R values from a mix and match of ten pictures were obtained. The average R values were plotted against increasing GlyP concentration.

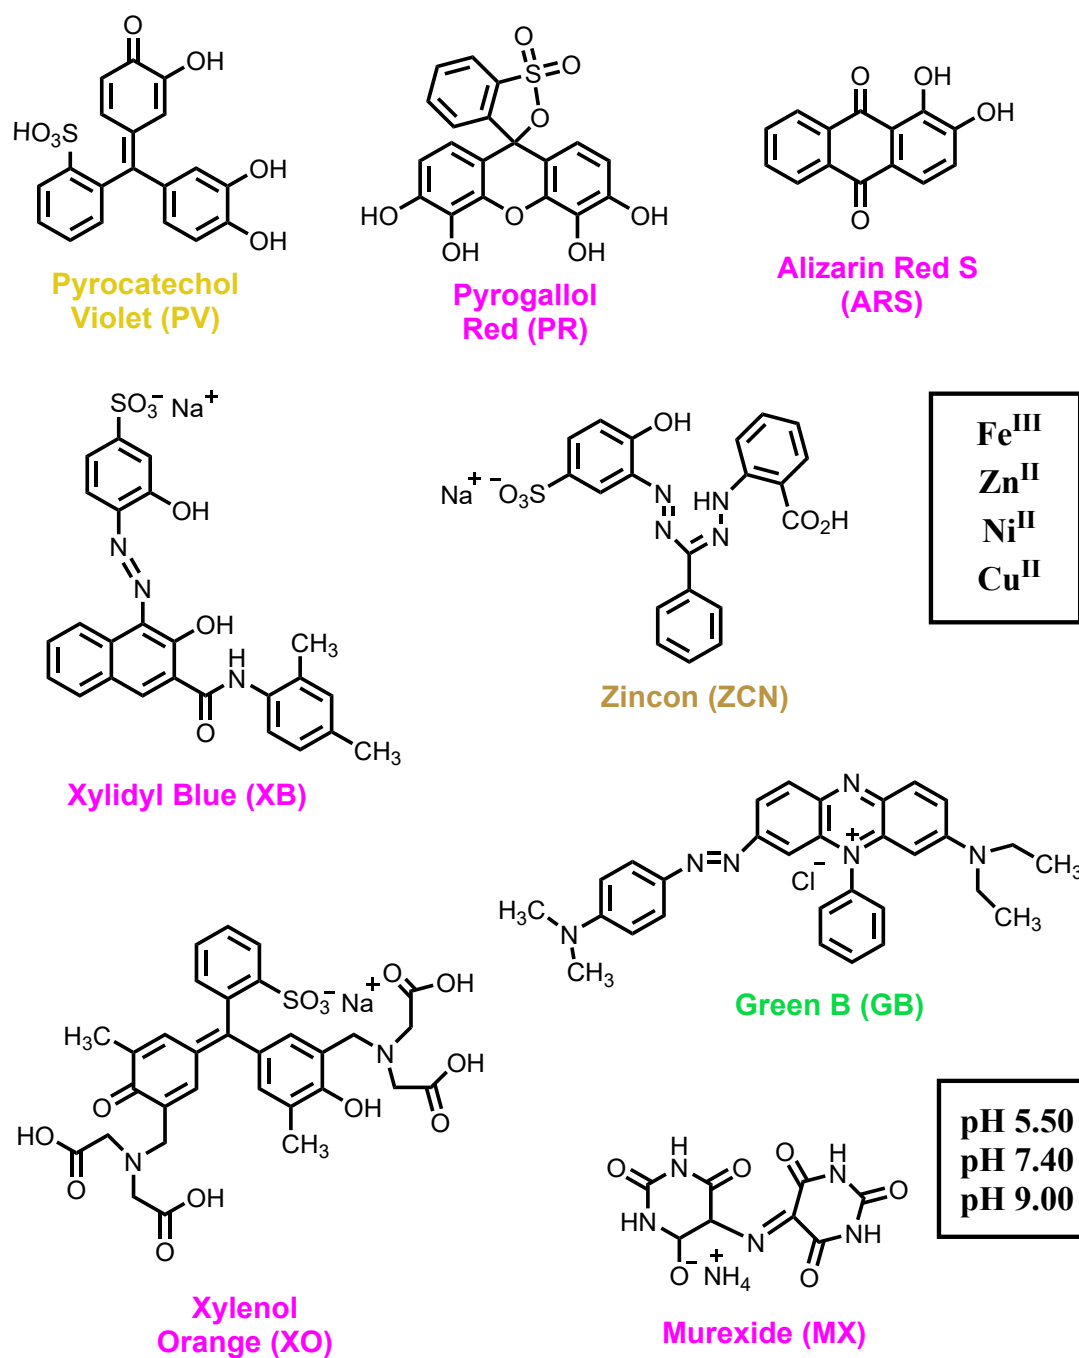

**Figure S1.** Overview of the eight indicators, four metal ions and three different pH used in the screening process.

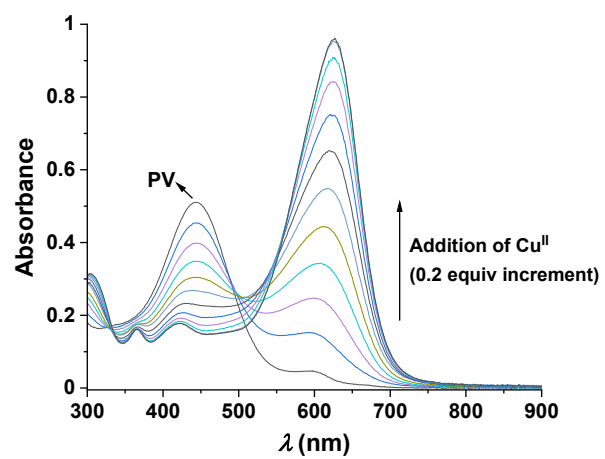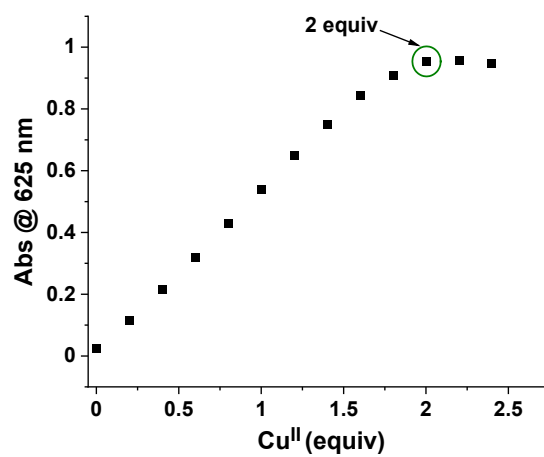

**Figure S2.** *Left:* Changes of absorbance of PV (30  $\mu\text{M}$ ;  $\lambda_{\text{max}} = 625 \text{ nm}$ ) upon addition of  $\text{Cu}^{\text{II}}$  (0 – 2.4 equiv) at pH 6.50, [HEPES buffer] = 10 mM. *Right:* Change of absorbance of PV (30  $\mu\text{M}$ ;  $\lambda_{\text{max}} = 625 \text{ nm}$ ) at 625 nm upon addition of  $\text{Cu}^{\text{II}}$  (0 – 2.4 equiv) at pH 6.50 ([HEPES buffer] = 10 mM) depicting saturation after 2 equiv of  $\text{Cu}^{\text{II}}$ .

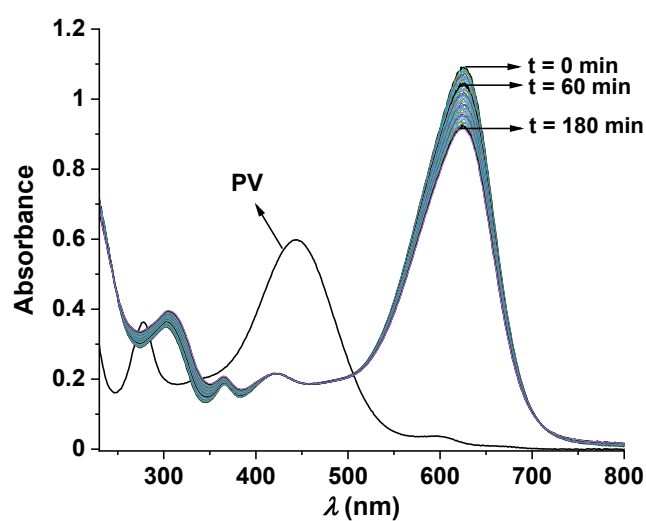

**Figure S3.** Changes of absorbance of  $\text{Cu}^{\text{II}}_2\text{-PV}$  (30  $\mu\text{M}$ ) over a period of 180 min in the absence of any analyte at pH 6.50 ([HEPES buffer] = 10 mM).

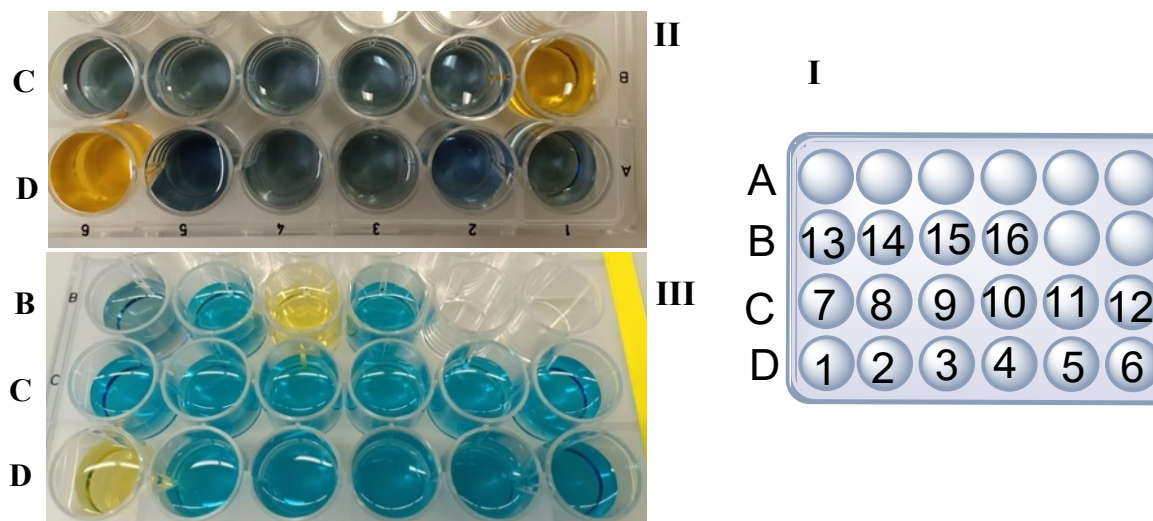

**Figure S4. I.** A depiction of a portion of a 26-well plate along with the rows (A, B, C, D) and numbers of the well (from 1 to 16). Note that only a portion of wells are shown which were used in experiments (I and II). **II:** Naked-eye selectivity test in a 26-well plate at pH 7.20 ([HEPES buffer] = 10 mM) of Zn<sup>II</sup>-zincon (30  $\mu$ M) with different ions (10 equiv; 0.3 mM). Row D: ZCN (1), Zn<sup>II</sup>-zincon (2), Zn<sup>II</sup>-zincon + [PO<sub>4</sub><sup>3-</sup> (3), NO<sub>3</sub><sup>-</sup> (4), CO<sub>3</sub><sup>2-</sup> (5), Cl<sup>-</sup> (6), Row C: SO<sub>4</sub><sup>2-</sup> (7), NH<sub>4</sub><sup>+</sup> (8), Ca<sup>2+</sup> (9), Mg<sup>2+</sup> (10), K<sup>+</sup> (11), GlyP (12)], **III:** Naked-eye selectivity test in a 26-well plate (at pH 6.50, HEPES buffer] = 10 mM) of Cu<sup>II</sup><sub>2</sub>-PV (30  $\mu$ M) with different anions (0.5 mM). Row D: PV (1), Cu<sup>II</sup><sub>2</sub>-PV (2), Cu<sup>II</sup><sub>2</sub>-PV + [PO<sub>4</sub><sup>3-</sup> (3), NO<sub>3</sub><sup>-</sup> (4), CO<sub>3</sub><sup>2-</sup> (5), Cl<sup>-</sup> (6), Row C: SO<sub>4</sub><sup>2-</sup> (7), NH<sub>4</sub><sup>+</sup> (8), Ca<sup>2+</sup> (9), Mg<sup>2+</sup> (10), K<sup>+</sup> (11), Mn<sup>2+</sup> (12), Row B: Fe<sup>3+</sup> (13), Zn<sup>2+</sup> (14), GlyP (15), Na<sup>+</sup> (16)].

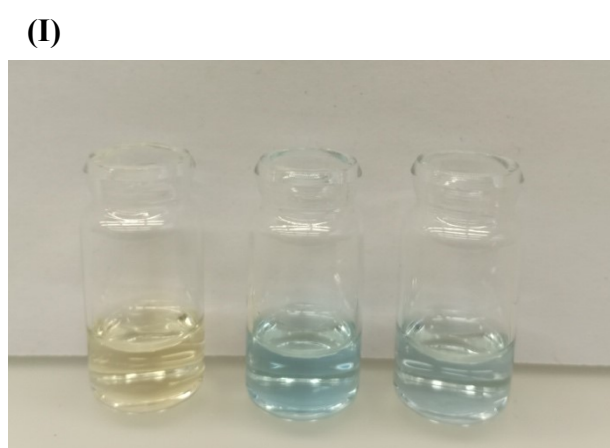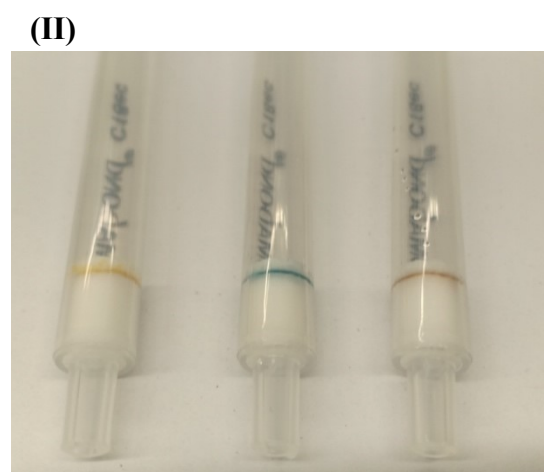

**Figure S5. I.** Naked-eye test in solution phase (pH 6.50, [HEPES] = 10 mM). *Left:* PV (5  $\mu$ M, 2 mL, light yellow); *Middle:* Cu<sup>II</sup><sub>2</sub>-PV (5  $\mu$ M, 2 mL, light blue); *Right:* Cu<sup>II</sup><sub>2</sub>-PV + GlyP (GlyP conc. = 4  $\mu$ M, 2 mL, blue color of complex fades). **II.** Immobilizations of PV and Cu<sup>II</sup><sub>2</sub>-PV on the top of C18ec cartridges at pH 6.50 ([HEPES] = 10 mM). *Left:* PV (2 mL, 5  $\mu$ M; 10 nmol; dark yellow), *Middle:* Cu<sup>II</sup><sub>2</sub>-PV (2 mL, 5  $\mu$ M; 10 nmol; *detection zone:* blue), *Right:* Cu<sup>II</sup><sub>2</sub>-PV + GlyP (2 mL, 4  $\mu$ M, 8 nmol; *detection zone:* dark yellow).

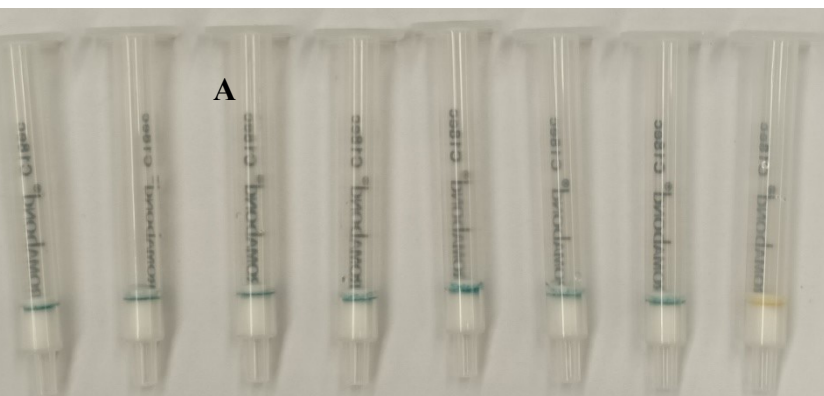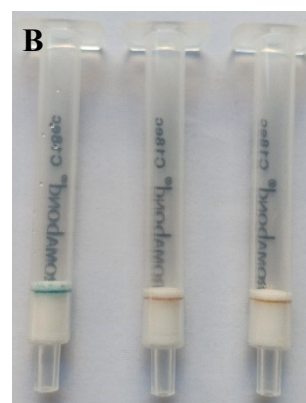

A photograph of the C18ec cartridges immobilized with PV (2 mL, 5  $\mu$ M; 10 nmol) in the presence of the metal ions in tap water; *Left to Right:* Cu<sup>II</sup><sub>2</sub>-PV, Cu<sup>II</sup><sub>2</sub>-PV with either Ca<sup>2+</sup>, Mg<sup>2+</sup>, Na<sup>+</sup>, K<sup>+</sup>, CO<sub>3</sub><sup>2-</sup>, Cl<sup>-</sup> or GlyP (2 mL, 50  $\mu$ M; 100 nmol). **II.** A photograph of the C18ec cartridges immobilized with Cu<sup>II</sup><sub>2</sub>-PV (2 mL, 5  $\mu$ M; 10 nmol) in the absence and the presence of other potential polydentate interferents; *Left to Right:* Cu<sup>II</sup><sub>2</sub>-PV, Cu<sup>II</sup><sub>2</sub>-PV with C<sub>2</sub>O<sub>4</sub><sup>2-</sup> and PPI (2 mL, 50  $\mu$ M; 100 nmol).\*

\*Note that C<sub>2</sub>O<sub>4</sub><sup>2-</sup> or PPI are not abundantly found in tap water and thus should not interfere with testing GlyP in tap water.

**Table S1:** A documentation of respective change in colors of six indicators (30  $\mu$ M) upon addition of four metal ions (1 or 2 equiv) at pH 5.50, 7.40 and 9.00 as a part of the 35 selected M<sup>n+</sup>-indicators after first step in the screening process. \*

| Indicators and M <sup>n+</sup> -Indicators | Observed Colors at different pH |             |         |
|--------------------------------------------|---------------------------------|-------------|---------|
|                                            | pH 9.00                         | pH 7.40     | pH 5.50 |
| PV                                         | blue                            | light green | yellow  |
| Fe <sup>3+</sup>                           | -                               | blue green  | blue    |
| Ni <sup>2+</sup>                           | -                               | blue        | -       |



|                        |           |               |              |
|------------------------|-----------|---------------|--------------|
| <b>Zn<sup>2+</sup></b> | violet    | blue          | -            |
| <b>Cu<sup>2+</sup></b> | -         | -             | blue         |
| <b>XB</b>              | purple    | pink          | pink         |
| <b>Ni<sup>2+</sup></b> | pink      | -             | -            |
| <b>Zn<sup>2+</sup></b> | pink      | -             | -            |
| <b>MX</b>              | pink      | pink          | pink         |
| <b>Zn<sup>2+</sup></b> | yellow    | yellow        | -            |
| <b>Ni<sup>2+</sup></b> | yellow    | yellow        | -            |
| <b>Cu<sup>2+</sup></b> | yellow    | yellow        | -            |
| <b>XO</b>              | pink      | magenta       | yellow       |
| <b>Fe<sup>3+</sup></b> | -         | -             | light pink   |
| <b>Ni<sup>2+</sup></b> | purple    | purple        | light purple |
| <b>Zn<sup>2+</sup></b> | -         | pink          | pink         |
| <b>Cu<sup>2+</sup></b> | -         | pink          | pink         |
| <b>PR</b>              | pink      | pink          | pink         |
| <b>Fe<sup>3+</sup></b> | -         | -             | blue purple  |
| <b>Ni<sup>2+</sup></b> | purple    | purple        | -            |
| <b>Cu<sup>2+</sup></b> | purple    | purple        | purple       |
| <b>ZCN</b>             | orange    | yellow orange | yellow       |
| <b>Fe<sup>3+</sup></b> | -         | -             | light pink   |
| <b>Ni<sup>2+</sup></b> | grey-blue | grey-blue     | -            |
| <b>Zn<sup>2+</sup></b> | dark blue | dark blue     | -            |
| <b>Cu<sup>2+</sup></b> | blue      | blue          | -            |

*The documented change in colors suggests formation of  $M^{n+}$ -indicators. Only 35 combinations of the selected  $M^{n+}$ -indicators are shown.*

**Table S2:** A documentation of respective change in colors of selected nine  $M^{n+}$ -indicators (30  $\mu M$ ) upon addition of  $PO_4^{3-}$  and GlyP (10 equiv) at pH 5.50, 7.40 and 9.00 as a part of the second step in the screening process. \*

\*NR: No reaction (i.e. no visual color change); color of the  $M^{n+}$ -indicator remains unchanged. 'Reacts' indicates formation of metal free indicator. Only 9 combinations of the selected  $M^{n+}$ -indicators are shown.

| Indicators and $M^{n+}$ -Indicators |           | Observed difference |        |
|-------------------------------------|-----------|---------------------|--------|
| pH 9.00                             |           | pH                  |        |
| PV                                  | blue      | High                |        |
| $Ni^{2+}$                           | -         | Low                 |        |
| $PO_4^{3-}$                         | -         | High                |        |
| GlyP                                | -         | reacts              | -      |
| $Zn^{2+}$                           | violet    | blue                | -      |
| $PO_4^{3-}$                         | -         | NR                  | -      |
| GlyP                                | -         | reacts              | -      |
| $Cu^{2+}$                           | -         | -                   | blue   |
| $PO_4^{3-}$                         | -         | -                   | NR     |
| GlyP                                | -         | -                   | reacts |
| MX                                  | pink      | pink                | pink   |
| $Ni^{2+}$                           | yellow    | yellow              | -      |
| $PO_4^{3-}$                         | NR        | NR                  | -      |
| GlyP                                | reacts    | reacts              | -      |
| PR                                  | pink      | pink                | pink   |
| $Ni^{2+}$                           | purple    | purple              | -      |
| $PO_4^{3-}$                         | NR        | NR                  | -      |
| GlyP                                | reacts    | reacts              | -      |
| ZCN                                 | orange    | yellow orange       | yellow |
| $Zn^{2+}$                           | dark blue | dark blue           | -      |
| $PO_4^{3-}$                         | NR        | NR                  | -      |
| GlyP                                | reacts    | reacts              | -      |

**Figure S7.** A picture of the whole screening process of plate 1 including the first and second step of the screening process. It includes change in colors of eight indicators (30  $\mu\text{M}$ ) in presence of four metal ions at pH 5.50, 7.40 and 9.00 and change in color of the selected  $\text{M}^{\text{n}+}$ -

| PLATE 1                 |                                    |                         |                                                                 |
|-------------------------|------------------------------------|-------------------------|-----------------------------------------------------------------|
| Plate<br>hole<br>number | Constituent                        | Plate<br>hole<br>number | Constituent                                                     |
| 1                       | PV (light green, 7.40)             | 49                      | MU + $\text{Zn}^{2+}$ + $\text{PO}_4^{3-}$ (reacts<br>overtime) |
| 2                       | PV + $\text{Fe}^{3+}$ (blue-green) | 50                      | MU + $\text{Zn}^{2+}$ + GlyP (reacts)                           |

indicators (30  $\mu\text{M}$ ) upon addition of  $\text{PO}_4^{3-}$  and/or GlyP (10 equiv). Numbering of well plates is depicted in right.

**Table S3:** A documentation of changes in colors observed in plate 1 (Figure S7).\*

|    |                                                                        |    |                                                              |
|----|------------------------------------------------------------------------|----|--------------------------------------------------------------|
| 3  | PV + $\text{Fe}^{3+}$ + $\text{PO}_4^{3-}$ (reacts)                    | 51 | MU + $\text{Zn}^{2+}$ (yellow-pink, 7.40)                    |
| 4  | PV (yellow, <b>5.50</b> )                                              | 52 | MU + $\text{Zn}^{2+}$ + GlyP (reacts)                        |
| 5  | PV + $\text{Fe}^{3+}$ (light blue)                                     | 53 | MU + $\text{Zn}^{2+}$ + $\text{PO}_4^{3-}$ (reacts overtime) |
| 6  | PV + $\text{Fe}^{3+}$ + $\text{PO}_4^{3-}$ (NR)                        | 54 | <b>XO (pink, 9.00)</b>                                       |
| 7  | PV + $\text{Fe}^{3+}$ + GlyP (reacts but fading)                       | 55 | XO + $\text{Fe}^{3+}$ (NR)                                   |
| 8  | PV (yellow, <b>5.50</b> )                                              | 56 | XO (light red/magenta, <b>7.40</b> )                         |
| 9  | PV + $\text{Ni}^{2+}$ (NR)                                             | 57 | XO + $\text{Fe}^{3+}$ (NR)                                   |
| 10 | PV (light green, <b>7.40</b> )                                         | 58 | XO (yellow, <b>5.50</b> )                                    |
| 11 | PV + $\text{Ni}^{2+}$ (reacts but fading)                              | 59 | XO + $\text{Fe}^{3+}$ (light pink)                           |
| 12 | PV + $\text{Ni}^{2+}$ + $\text{PO}_4^{3-}$ (NR, fading)                | 60 | XO + $\text{Fe}^{3+}$ + $\text{PO}_4^{3-}$ (NR)              |
| 13 | PV + $\text{Ni}^{2+}$ + GlyP (reacts)                                  | 61 | XO + $\text{Fe}^{3+}$ + GlyP (NR)                            |
| 14 | PV (light green, <b>7.40</b> )                                         | 62 | XO + $\text{Ni}^{2+}$ (purple, <b>9.00</b> )                 |
| 15 | PV + $\text{Zn}^{2+}$ (blue color)                                     | 63 | XO + $\text{Ni}^{2+}$ + $\text{PO}_4^{3-}$ (NR)              |
| 16 | PV + $\text{Zn}^{2+}$ + $\text{PO}_4^{3-}$ (NR)                        | 64 | XO + $\text{Ni}^{2+}$ + GlyP (NR)                            |
| 17 | PV + $\text{Zn}^{2+}$ + GLY (reacts)                                   | 65 | XO + $\text{Ni}^{2+}$ (purple, <b>7.40</b> )                 |
| 18 | PV + $\text{Zn}^{2+}$ + $\text{Fe}^{3+}$ (initial blue color deepens)  | 66 | XO + $\text{Ni}^{2+}$ + $\text{PO}_4^{3-}$ (NR)              |
| 19 | PV + $\text{Ni}^{2+}$ + $\text{Zn}^{2+}$ (sky blue color)              | 67 | XO + $\text{Ni}^{2+}$ + GlyP (NR)                            |
| 20 | PV + $\text{Ni}^{2+}$ + $\text{Fe}^{3+}$ (slight color change in blue) | 68 | XO + $\text{Ni}^{2+}$ (light purple, <b>5.50</b> )           |
| 21 | <b>XB (pink, 5.50)</b>                                                 | 69 | XO + $\text{Ni}^{2+}$ + $\text{PO}_4^{3-}$ (NR)              |
| 22 | XB + $\text{Fe}^{3+}$ (NR)                                             | 70 | XO + $\text{Ni}^{2+}$ + GlyP (NR)                            |
| 23 | XB (purple, <b>9.00</b> )                                              | 71 | XO + $\text{Zn}^{2+}$ ( <b>9.00</b> , NR)                    |
| 24 | XB + $\text{Fe}^{3+}$ (NR)                                             | 72 | blank                                                        |
| 25 | XB (purple, <b>9.00</b> )                                              | 73 | XO + $\text{Zn}^{2+}$ ( <b>5.50</b> , pink)                  |
| 26 | XB + $\text{Ni}^{2+}$ (pink)                                           | 74 | XO + $\text{Zn}^{2+}$ + $\text{PO}_4^{3-}$ (NR)              |

|    |                                                                                  |    |                                                                      |
|----|----------------------------------------------------------------------------------|----|----------------------------------------------------------------------|
| 27 | XB + + <b>Ni<sup>2+</sup></b> + GlyP (NR)                                        | 75 | XO + <b>Zn<sup>2+</sup></b> + GlyP (NR)                              |
| 28 | XB + + <b>Ni<sup>2+</sup></b> + PO <sub>4</sub> <sup>3-</sup> (NR)               | 76 | XO + <b>Cu<sup>2+</sup></b> ( <b>9.00</b> , NR)                      |
| 29 | XB (pink, <b>7.40</b> )                                                          | 77 | XO + <b>Cu<sup>2+</sup></b> ( <b>5.50</b> , pink) + GlyP (NR)        |
| 30 | XB + <b>Ni<sup>2+</sup></b> (NR)                                                 | 78 | <b>ARS (light pink, 9.00)</b>                                        |
| 31 | XB + <b>Zn<sup>2+</sup></b> (pink)+ PO <sub>4</sub> <sup>3-</sup> (NR)+GlyP (NR) | 79 | ARS + <b>Fe<sup>3+</sup></b> (NR)                                    |
| 32 | <b>GB (green, 9.00)</b>                                                          | 80 | ARS (light pink, <b>7.40</b> )                                       |
| 33 | GB + <b>Fe<sup>3+</sup></b> (NR)                                                 | 81 | ARS + <b>Fe<sup>3+</sup></b> (NR)                                    |
| 34 | GB (green, <b>5.50</b> )                                                         | 82 | ARS (v. light pink, <b>5.50</b> )                                    |
| 35 | GB + <b>Fe<sup>3+</sup></b> (NR, green aggregate)                                | 83 | ARS + <b>Fe<sup>3+</sup></b> (pink color intensified)                |
| 36 | GB + <b>Ni<sup>2+</sup></b> ( <b>9.00</b> , NR)                                  | 84 | ARS + <b>Ni<sup>2+</sup></b> ( <b>9.00</b> , pink color intensified) |
| 37 | GB + <b>Ni<sup>2+</sup></b> ( <b>5.50</b> , NR)                                  | 85 | ARS + <b>Ni<sup>2+</sup></b> ( <b>7.40</b> , pink color intensified) |
| 38 | GB + <b>Ni<sup>2+</sup></b> ( <b>7.40</b> , NR)                                  | 86 | ARS + <b>Ni<sup>2+</sup></b> ( <b>5.50</b> , NR)                     |
| 39 | GB + <b>Zn<sup>2+</sup></b> ( <b>9.00</b> , NR)                                  | 87 | ARS + <b>Cu<sup>2+</sup></b> ( <b>9.00</b> , pink color intensified) |
| 40 | GB + <b>Zn<sup>2+</sup></b> ( <b>7.40</b> , NR)                                  | 88 | ARS + <b>Cu<sup>2+</sup></b> ( <b>7.40</b> , pink color intensified) |
| 41 | GB + <b>Zn<sup>2+</sup></b> ( <b>5.50</b> , NR)                                  | 89 | ARS + <b>Cu<sup>2+</sup></b> ( <b>5.50</b> , pink color intensified) |
| 42 | <b>MU (pink, 9.00)</b>                                                           | 90 | ARS + <b>Zn<sup>2+</sup></b> ( <b>9.00</b> , pink color intensified) |
| 43 | MU + <b>Fe<sup>3+</sup></b> (NR)                                                 | 91 | <b>ZCN (orange, 9.00)</b>                                            |
| 44 | MU (pink, <b>7.40</b> )                                                          | 92 | ZCN + <b>Fe<sup>3+</sup></b> (NR)                                    |
| 45 | MU + <b>Fe<sup>3+</sup></b> (NR)                                                 | 93 | ZCN (yellow-orange, <b>7.40</b> )                                    |
| 46 | MU (pink, <b>5.50</b> )                                                          | 94 | ZCN + <b>Fe<sup>3+</sup></b> (NR)                                    |
| 47 | MU + <b>Fe<sup>3+</sup></b> (NR)                                                 | 95 | ZCN (yellow, <b>5.50</b> )                                           |

|           |                                            |           |                                                          |
|-----------|--------------------------------------------|-----------|----------------------------------------------------------|
| <b>48</b> | <b>MU + Zn<sup>2+</sup> (9.00, yellow)</b> | <b>96</b> | <b>ZCN + Fe<sup>3+</sup> (light pink-fades overtime)</b> |
|-----------|--------------------------------------------|-----------|----------------------------------------------------------|

\*NR: No reaction (i.e.no visual color change). 'Reacts' indicates either formation of M<sup>n+</sup>-indicator or metal free indicator in presence of analyte.

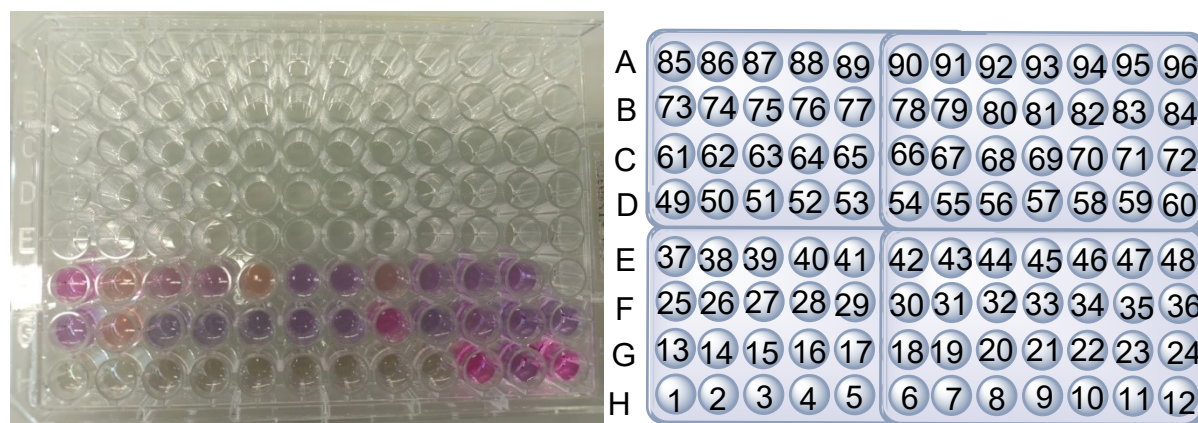

**Figure S8.** A picture of the whole screening process of plate 2 including the first and second step of the screening process. It includes change in colors of eight indicators (30  $\mu$ M) in presence of four metal ions at pH 5.50, 7.40 and 9.00 and change in color of the selected M<sup>n+</sup>-indicators (30  $\mu$ M) upon addition of PO<sub>4</sub><sup>3-</sup> and/or GlyP (10 equiv). Numbering of well plates is depicted in right.

**Table S4:** A documentation of changes in colors observed in plate 2 (Figure S8). \*

| <b>Plate<br/>hole<br/>number</b> | <b>Constituent</b>                                                         | <b>Plate<br/>hole<br/>number</b> | <b>Constituent</b>                                         |
|----------------------------------|----------------------------------------------------------------------------|----------------------------------|------------------------------------------------------------|
| <b>1</b>                         | ZCN + Fe <sup>3+</sup> + PO <sub>4</sub> <sup>3-</sup> ( <b>5.50</b> , NR) | <b>18</b>                        | PR + Ni <sup>2+</sup> ( <b>9.00</b> , purple)              |
| <b>2</b>                         | ZCN + Fe <sup>3+</sup> + GlyP ( <b>5.50</b> , NR)                          | <b>19</b>                        | PR + Ni <sup>2+</sup> + PO <sub>4</sub> <sup>3-</sup> (NR) |
| <b>3</b>                         | ZCN + Ni <sup>2+</sup> ( <b>9.00</b> , grey-blue)                          | <b>20</b>                        | PR + Ni <sup>2+</sup> + GlyP (reacts)                      |
| <b>4</b>                         | ZCN + Ni <sup>2+</sup> + PO <sub>4</sub> <sup>3-</sup> (NR)                | <b>21</b>                        | PR + Ni <sup>2+</sup> + Fe <sup>3+</sup> (NR)              |

|    |                                                  |    |                                                                                  |
|----|--------------------------------------------------|----|----------------------------------------------------------------------------------|
| 5  | ZCN + $\text{Ni}^{2+}$ + GlyP (NR)               | 22 | PR + $\text{Ni}^{2+}$ + $\text{Zn}^{2+}$ (slight color change to pinkish violet) |
| 6  | ZCN + $\text{Ni}^{2+}$ (7.40, grey-blue)         | 23 | PR + $\text{Ni}^{2+}$ (7.40, purple-pink)                                        |
| 7  | ZCN + $\text{Ni}^{2+}$ + $\text{PO}_4^{3-}$ (NR) | 24 | PR + $\text{Ni}^{2+}$ + $\text{PO}_4^{3-}$ (NR)                                  |
| 8  | ZCN + $\text{Ni}^{2+}$ + GlyP (NR)               | 25 | PR + $\text{Ni}^{2+}$ + GlyP (reacts)                                            |
| 9  | ZCN + $\text{Ni}^{2+}$ (5.50, NR)                | 26 | PR + $\text{Ni}^{2+}$ (5.50, NR)                                                 |
| 10 | PR (pink, 9.00)                                  | 27 | PR + $\text{Zn}^{2+}$ (9.00, NR)                                                 |
| 11 | PR + $\text{Fe}^{3+}$ (NR)                       | 28 | PR + $\text{Zn}^{2+}$ (7.40, NR)                                                 |
| 12 | PR (pink, 7.40)                                  | 29 | PR + $\text{Zn}^{2+}$ (5.50, NR)                                                 |
| 13 | PR + $\text{Fe}^{3+}$ (NR)                       | 30 | PR + $\text{Cu}^{2+}$ (5.50, purple)                                             |
| 14 | PR (pink-red, 5.50)                              | 31 | PR + $\text{Cu}^{2+}$ + $\text{PO}_4^{3-}$ (NR)                                  |
| 15 | PR + $\text{Fe}^{3+}$ (blue-purple)              | 32 | PR + $\text{Cu}^{2+}$ + GlyP (slow, lightens purple color)                       |
| 16 | PR + $\text{Fe}^{3+}$ + $\text{PO}_4^{3-}$ (NR)  | 33 | PR + $\text{Cu}^{2+}$ (9.00, purple)                                             |
| 17 | PR + $\text{Fe}^{3+}$ + GlyP (NR)                | 34 | PR + $\text{Cu}^{2+}$ + $\text{PO}_4^{3-}$ (NR)                                  |
|    |                                                  | 35 | PR + $\text{Cu}^{2+}$ + GlyP (NR)                                                |

\*NR: No reaction (i.e.no visual color change). 'Reacts' indicates either formation of  $\text{M}^{n+}$ -indicator or metal free indicator in presence of analyte.

## S5. References

- [S1]. *Hydrology Project, Training Module, Major Ions in Water.* (<http://nhp.mowr.gov.in/docs/HP2/MANUALS/Water%20Quality/5014/-download-manuals-WaterQuality-WQManuals-28MajorIonsinWater.pdf>).
- [S2]. A. A. Hill, R. J. Lipert, J. S. Fritz, M. D. Porter, *Talanta* **2009**, 77, 1405-1408.
- [S3]. M. P. Arena, M. D. Porter, J. S. Fritz, *Anal. Chem.* **2002**, 74, 185-190.
- [S4]. D. B. Gazda, J. S. Fritz, M. D. Porter, *Anal. Chim. Acta* **2004**, 508, 53-59.
